# Supplementary material
Source: publisher site journal article supplement (https://www.dovepress.com/article/242957)
Supplement: Supplementary file 1 [file get_supplementary_file.php]

Table S1. Symptomatic AR drugs with reimbursement status

| Description | ATC | Application form |
| --- | --- | --- |
| Nasal corticosteroids without antiinfectives | R01A1 | Nasal spray, drops, ointment |
| Nasal antiinfectives without corticosteroids | R01A4 | Nasal spray, drops, ointment |
| Nasal antiallergic agents | R01A6 | Nasal spray, drops, ointment |
| Nasal decongestants | R01A7 | Nasal spray, drops, ointment |
| Other topical nasal preparations | R01A9 | Nasal spray, drops, ointment |
| Systemic rhinological preparations | R01B0 | Systemic |
| Systemic antihistamines | R06A0 | Systemic |

Table S2. Ophthalmic drugs with and without reimbursement status

| Description | ATC | Application form |
| --- | --- | --- |
| Ophthalmic corticosteroids without antiinfectives | S01B0 | Eye drops |
| Ophthalmic corticosteroids with antiinfectives | S01C1 | Eye drops |
| Ophthalmic antiallergic antihistamines | S01G1 | Eye drops |
| Ophthalmic antiallergic mast cell stabilisers | S01G2 | Eye drops |
| Other ophthalmic antiallergic agents | S01G3 | Eye drops |
| Ophthalmic decongestants with sympatomimetics | S01G5 | Eye drops |
| Ophthalmic antiseptants | S01G6 | Eye drops |
| Other similar ophthalmic agents | S01G9 | Eye drops |

Table S3. Asthma medication included in the analyses

| Description | ATC |
| --- | --- |
| Oral/systemic short acting ß-agonists (SABA) | R03A2 |
| Inhaled short acting ß-agonists (SABA) | R03A4 |
| Inhaled corticosteroids (ICS) | R03D1 |
| Inhaled corticosteroid / ß-agonist fixed combinations (ICS/LABA) | R03F1 |
| Oral leukotriene antagonists | R03J2 |

Figure S1. Summary of the attrition process in overall allergoid immunotherapy, sublingual immunotherapy and control patients for **grass pollen** (a-c) and **early bloomer pollen** (d-f) for the analysis of AR and asthma progression among **all patients** (percentages given relative to previous step)

Figure S1 (ctd.). Summary of the attrition process in overall allergoid immunotherapy, sublingual immunotherapy and control patients for **grass pollen** (a-c) and **early bloomer pollen** (d-f) for the analysis of AR and asthma progression among **all patients** (percentages given relative to previous step)

Figure S1 (ctd.). Summary of the attrition process in overall allergoid immunotherapy, sublingual immunotherapy and control patients for **grass pollen** (a-c) and **early bloomer pollen** (d-f) for the analysis of AR and asthma progression among **all patients** (percentages given relative to previous step)

Figure S2. Summary of the attrition process in overall allergoid immunotherapy, sublingual immunotherapy and control patients for **grass pollen** (a-c) and **early bloomer pollen** (d-f) for the analysis of AR and asthma progression among **juvenile patients** (percentages given relative to previous step)

Figure S2 (ctd.). Summary of the attrition process in overall allergoid immunotherapy, sublingual immunotherapy and control patients for **grass pollen** (a-c) and **early bloomer pollen** (d-f) for the analysis of AR and asthma progression among **juvenile patients** (percentages given relative to previous step)

Figure S2 (ctd.). Summary of the attrition process in overall allergoid immunotherapy, sublingual immunotherapy and control patients for **grass pollen** (a-c) and **early bloomer pollen** (d-f) for the analysis of AR and asthma progression among **juvenile patients** (percentages given relative to previous step)
